# Supplementary material for: Tailless/TLX reverts intermediate neural progenitors to stem cells driving tumourigenesis via repression of asense/ASCL1
Source: eLife. 2020 Feb 19;9:e53377. doi: 10.7554/eLife.53377 (PMC7058384; doi:10.7554/eLife.53377)
Supplement: Figure 6—figure supplement 2—source data 1. [file elife-53377-fig6-figsupp2-data1.xlsx]

## Sheet: Sheet1
2mit
5-HT1B
5-HT2B
5-HT7
a5
Aats-arg
Aats-his
ab
abd-A
Abl
abo
abs
Ac76E
AcCoAS
Acf1
Acp36DE
Acp62F
Acp76A
Act5C
Actn
ACXC
Acyp
Ada
AdamTS-A
Adhr
Ady43A
Aef1
Afti
Ag5r
AGBE
ago
AGO1
Ahcy89E
al
Aldh
Aldh-III
Alh
alpha-Cat
alpha-Man-I
alpha4GT1
alphaKap4
alphaSnap
alrm
aly
Ama
amn
amon
Amun
Amy-p
Ance-5
Andorra
Ank2
Antp
AnxB10
AnxB11
aop
aos
AOX3
AOX4
ap
Apc
APC10
APC4
ApepP
aPKC
app
Aps
apt
ara
aralar1
Argk
arr
Art9
Asator
ase
ash2
asp
ASPP
AstA
AstA-R1
AstA-R2
Atg1
Atg10
Atg17
Atg5
Atg8b
atl
Atpalpha
ATPCL
Atu
aub
aurB
aust
Awh
B4
bab1
bab2
babos
Bacc
Baldspot
bap
baz
bbg
BCL7-like
bdg
be
beat-Ib
beat-IIa
beat-IIIa
beat-Va
beat-Vc
beat-VI
beat-VII
bel
Best1
Best4
Bet5
beta-Spec
betaNACtes3
betaNACtes4
betaTub60D
betaTub97EF
Bgb
bi
bib
bif
bigmax
Bin1
bin3
bip1
bl
Blimp-1
Blos3
blot
bnl
boi
bon
bor
bou
br
brat
Brd
brk
brp
bru-3
brv1
bsh
btd
Btk29A
bun
bur
Bx
C15
C3G
C901
Ca-alpha1T
Ca-beta
cact
Cad74A
Cad87A
CadN
CadN2
Caf1-105
Caf1-180
Calx
calypso
Cam
CaMKII
can
CAP
Capr
capu
cas
CCHa1-R
CCKLR-17D3
Ccn
Ccp84Ab
Cct1
Cct5
Cdep
cdi
CdsA
CecC
CenG1A
Cenp-C
Cerk
cert
cerv
Cf2
CG10011
CG10055
CG10089
CG10096
CG10097
CG10116
CG10126
CG10131
CG10147
CG10164
CG10176
CG10184
CG10195
CG10202
CG10222
CG10226
CG10280
CG10283
CG10395
CG10440
CG10462
CG10465
CG10477
CG10512
CG10550
CG10570
CG10646
CG10651
CG10734
CG10750
CG10752
CG10827
CG10869
CG10881
CG10903
CG10918
CG10943
CG10950
CG10959
CG10993
CG11000
CG11041
CG11106
CG11122
CG11123
CG11138
CG11145
CG11148
CG11192
CG11210
CG11251
CG11286
CG11298
CG11313
CG11317
CG11319
CG11337
CG11340
CG11356
CG11360
CG11362
CG1137
CG11381
CG11396
CG11403
CG11404
CG11447
CG11449
CG11453
CG11456
CG11486
CG11523
CG11576
CG11588
CG11630
CG11663
CG11665
CG11666
CG11686
CG11726
CG11737
CG11791
CG11811
CG11825
CG11828
CG11873
CG11913
CG11929
CG11964
CG11982
CG11997
CG12007
CG12027
CG12054
CG12061
CG12065
CG12107
CG12112
CG12123
CG12147
CG12241
CG12333
CG12347
CG1239
CG12391
CG12395
CG12413
CG12426
CG12438
CG12446
CG12448
CG12480
CG12483
CG12484
CG12496
CG12506
CG12507
CG12516
CG12520
CG12521
CG12535
CG12594
CG12607
CG12609
CG12617
CG12637
CG1265
CG12680
CG12681
CG12682
CG12684
CG12689
CG12691
CG12693
CG12699
CG1271
CG12721
CG12730
CG12746
CG12768
CG12780
CG12822
CG12831
CG12858
CG12863
CG12869
CG12877
CG12898
CG12910
CG12963
CG12964
CG12984
CG12985
CG1299
CG13002
CG13031
CG13055
CG13062
CG13110
CG13123
CG13133
CG13135
CG13168
CG1317
CG13171
CG13185
CG13186
CG13193
CG13197
CG13230
CG1324
CG13244
CG13247
CG13251
CG13252
CG13287
CG13296
CG13297
CG13305
CG13315
CG13321
CG13323
CG13325
CG13332
CG13334
CG13366
CG13405
CG13408
CG13454
CG13482
CG13539
CG1354
CG13558
CG13577
CG13579
CG13616
CG13624
CG13699
CG13700
CG13711
CG13716
CG13737
CG13766
CG13784
CG13786
CG13810
CG13830
CG13865
CG13872
CG13891
CG13898
CG13905
CG13912
CG13931
CG1394
CG13954
CG13983
CG13989
CG1399
CG13994
CG13995
CG14011
CG14050
CG14062
CG14069
CG14075
CG14111
CG14115
CG14120
CG14128
CG1416
CG14182
CG14184
CG14190
CG14200
CG14234
CG14245
CG14252
CG14265
CG14280
CG14282
CG14297
CG14298
CG14299
CG14310
CG14330
CG14354
CG14362
CG14372
CG14401
CG14416
CG14424
CG14427
CG14431
CG14438
CG14441
CG14454
CG14455
CG14457
CG14459
CG14478
CG14491
CG14502
CG14506
CG14508
CG14567
CG14598
CG14634
CG14657
CG14658
CG14661
CG14671
CG14691
CG14693
CG14715
CG14718
CG14721
CG14731
CG14744
CG14756
CG14810
CG14826
CG14830
CG14837
CG14853
CG14882
CG14891
CG14926
CG14937
CG14945
CG14985
CG14990
CG1504
CG15040
CG15080
CG15115
CG15116
CG15136
CG15142
CG15143
CG15145
CG1516
CG15185
CG15186
CG15198
CG15200
CG15225
CG15233
CG15239
CG15254
CG15258
CG15270
CG15283
CG1529
CG15296
CG15333
CG15343
CG15357
CG15394
CG15403
CG15408
CG15429
CG1544
CG15450
CG15452
CG15473
CG15485
CG1550
CG15544
CG15548
CG15549
CG15550
CG15553
CG15564
CG15570
CG15578
CG15594
CG15599
CG15601
CG15630
CG15631
CG15646
CG15711
CG15754
CG15771
CG15822
CG15878
CG15882
CG15890
CG15925
CG1598
CG1636
CG16704
CG16721
CG16732
CG16762
CG1677
CG16779
CG16791
CG16798
CG16799
CG16800
CG16837
CG16857
CG16879
CG1688
CG16898
CG16903
CG16935
CG16989
CG17003
CG1701
CG17010
CG17030
CG17048
CG17110
CG17122
CG17134
CG17207
CG17230
CG17242
CG17244
CG17265
CG17298
CG1732
CG17323
CG17324
CG17325
CG17333
CG17341
CG17344
CG17349
CG17350
CG17364
CG17378
CG1746
CG17493
CG17508
CG17514
CG17564
CG17570
CG17580
CG17648
CG17669
CG17683
CG17684
CG17724
CG17744
CG17746
CG17816
CG17839
CG17974
CG17977
CG17994
CG17999
CG18067
CG18109
CG18136
CG1814
CG18208
CG18265
CG1835
CG18480
CG18508
CG18563
CG18605
CG18765
CG18769
CG18870
CG1888
CG1894
CG1902
CG1958
CG1986
CG1999
CG2003
CG2017
CG2053
CG2113
CG2118
CG2121
CG2201
CG2211
CG2217
CG2267
CG2336
CG2371
CG2611
CG2616
CG2811
CG2846
CG2854
CG2909
CG30015
CG30022
CG30049
CG3008
CG30080
CG30089
CG3011
CG30110
CG30114
CG30120
CG30152
CG30158
CG30159
CG30203
CG30338
CG30350
CG30389
CG30401
CG30411
CG30413
CG30419
CG30429
CG30430
CG30460
CG30466
CG30467
CG30479
CG30480
CG30497
CG3085
CG3092
CG31010
CG31050
CG3107
CG31086
CG31122
CG31128
CG31156
CG31191
CG31226
CG31235
CG31262
CG31275
CG31294
CG31296
CG31320
CG31337
CG31357
CG31437
CG31441
CG31446
CG31459
CG31517
CG31522
CG31559
CG3160
CG31612
CG31619
CG31639
CG3164
CG31646
CG31663
CG31677
CG31689
CG31690
CG31702
CG31709
CG31743
CG31750
CG31760
CG31769
CG31773
CG31797
CG31812
CG31813
CG31819
CG31820
CG31909
CG31913
CG31918
CG31921
CG31928
CG31988
CG3199
CG31997
CG32017
CG32066
CG32087
CG32103
CG3214
CG32147
CG32148
CG32182
CG32188
CG32189
CG32204
CG32235
CG32237
CG32264
CG32305
CG32333
CG32396
CG32432
CG32447
CG32450
CG32454
CG32479
CG32488
CG32521
CG32588
CG32683
CG32718
CG32719
CG32720
CG32758
CG32795
CG32806
CG32816
CG32832
CG32834
CG32846
CG32983
CG32984
CG32986
CG32988
CG33054
CG33056
CG33062
CG33080
CG33158
CG33259
CG33262
CG33275
CG3328
CG33296
CG33298
CG33299
CG33309
CG33322
CG33346
CG3339
CG33463
CG33467
CG3347
CG33474
CG33475
CG3348
CG33490
CG33557
CG3358
CG33640
CG33648
CG33667
CG33673
CG33695
CG33752
CG3376
CG33766
CG33795
CG33912
CG33919
CG33927
CG33970
CG34029
CG34045
CG34057
CG3408
CG3409
CG34106
CG34109
CG34113
CG34114
CG34161
CG34171
CG34172
CG34173
CG34184
CG34200
CG34217
CG34222
CG34236
CG34253
CG34278
CG34283
CG34307
CG34308
CG34313
CG34314
CG34353
CG34356
CG34362
CG3437
CG34371
CG34376
CG34377
CG34384
CG34391
CG34393
CG34398
CG34402
CG34425
CG34436
CG34449
CG34460
CG3473
CG3483
CG3523
CG3526
CG3552
CG3556
CG3568
CG3610
CG3625
CG3638
CG3645
CG3650
CG3651
CG3655
CG3663
CG3679
CG3714
CG3764
CG3775
CG3777
CG3795
CG3847
CG3942
CG4000
CG40178
CG4019
CG40191
CG4021
CG40498
CG4066
CG4073
CG4080
CG41099
CG41128
CG4116
CG41242
CG41378
CG41423
CG41520
CG4159
CG4161
CG4168
CG4218
CG4221
CG42232
CG42235
CG42238
CG42240
CG42261
CG42284
CG4229
CG42299
CG42305
CG42321
CG42323
CG42329
CG42336
CG42339
CG42343
CG42368
CG42369
CG4238
CG42382
CG42389
CG42402
CG42458
CG42492
CG42502
CG42507
CG42521
CG42523
CG42524
CG42534
CG42541
CG42596
CG42598
CG42613
CG42637
CG42662
CG42663
CG42668
CG4267
CG42672
CG42673
CG42674
CG42675
CG42678
CG42680
CG42682
CG42684
CG42692
CG42710
CG42732
CG42740
CG42747
CG42751
CG42758
CG4278
CG42784
CG42790
CG42795
CG42807
CG42808
CG42830
CG42837
CG42852
CG42878
CG4293
CG43049
CG43055
CG43058
CG43064
CG43068
CG43077
CG43078
CG43082
CG43098
CG43106
CG43111
CG43116
CG43131
CG43143
CG43149
CG43163
CG43169
CG43172
CG43175
CG43188
CG43189
CG43192
CG43194
CG43198
CG43207
CG43210
CG43230
CG43236
CG43237
CG43245
CG43273
CG43312
CG43335
CG43336
CG43337
CG43340
CG4335
CG43350
CG43355
CG43402
CG43403
CG43438
CG43441
CG43448
CG43658
CG43666
CG43675
CG43689
CG43702
CG43729
CG43731
CG43732
CG43736
CG43737
CG43742
CG4375
CG43750
CG43759
CG43783
CG43795
CG43800
CG4382
CG43844
CG43867
CG4390
CG43901
CG43919
CG43954
CG43968
CG43980
CG44014
CG44037
CG44038
CG44044
CG44090
CG44195
CG44227
CG44242
CG44243
CG44250
CG44251
CG44259
CG44335
CG44355
CG44362
CG4438
CG44422
CG44438
CG44439
CG44476
CG4467
CG4477
CG4480
CG44815
CG4483
CG44954
CG44956
CG4496
CG45002
CG45011
CG45049
CG45050
CG45062
CG45075
CG45080
CG45092
CG45093
CG45186
CG4520
CG45263
CG45307
CG45413
CG45545
CG45546
CG45603
CG4563
CG45781
CG45783
CG45784
CG4629
CG4631
CG4702
CG4704
CG4725
CG4729
CG4763
CG4766
CG4788
CG4810
CG4839
CG4849
CG4866
CG4882
CG4891
CG4907
CG4908
CG4970
CG4975
CG4984
CG4988
CG5002
CG5004
CG5050
CG5087
CG5103
CG5149
CG5189
CG5204
CG5254
CG5270
CG5273
CG5346
CG5397
CG5455
CG5493
CG5525
CG5548
CG5550
CG5569
CG5608
CG5621
CG5642
CG5662
CG5674
CG5705
CG5724
CG5768
CG5773
CG5804
CG5835
CG5853
CG5866
CG5890
CG5910
CG5934
CG5938
CG5953
CG6005
CG6094
CG6123
CG6125
CG6126
CG6138
CG6142
CG6145
CG6149
CG6154
CG6163
CG6178
CG6216
CG6220
CG6231
CG6244
CG6280
CG6282
CG6287
CG6308
CG6310
CG6330
CG6332
CG6345
CG6353
CG6404
CG6414
CG6424
CG6481
CG6488
CG6497
CG6508
CG6509
CG6527
CG6574
CG6614
CG6628
CG6629
CG6656
CG6660
CG6664
CG6685
CG6726
CG6739
CG6767
CG6770
CG6785
CG6812
CG6836
CG6845
CG6891
CG6893
CG6908
CG6914
CG6950
CG6966
CG6983
CG7054
CG7079
CG7137
CG7140
CG7214
CG7231
CG7255
CG7294
CG7304
CG7320
CG7337
CG7362
CG7372
CG7407
CG7548
CG7560
CG7568
CG7603
CG7606
CG7653
CG7692
CG7694
CG7707
CG7708
CG7720
CG7724
CG7742
CG7759
CG7766
CG7791
CG7837
CG7845
CG7856
CG7872
CG7882
CG7884
CG7900
CG7912
CG7956
CG7991
CG8034
CG8036
CG8078
CG8100
CG8112
CG8119
CG8128
CG8141
CG8177
CG8180
CG8202
CG8204
CG8281
CG8289
CG8303
CG8353
CG8360
CG8369
CG8370
CG8372
CG8397
CG8399
CG8405
CG8460
CG8475
CG8476
CG8483
CG8578
CG8641
CG8654
CG8679
CG8712
CG8735
CG8777
CG8786
CG8920
CG8927
CG8952
CG9005
CG9101
CG9166
CG9171
CG9222
CG9231
CG9235
CG9281
CG9308
CG9330
CG9380
CG9410
CG9411
CG9426
CG9465
CG9483
CG9492
CG9570
CG9582
CG9596
CG9624
CG9650
CG9657
CG9692
CG9698
CG9701
CG9747
CG9757
CG9759
CG9801
CG9837
CG9839
CG9863
CG9864
CG9899
CG9932
CG9934
CG9970
CG9986
CG9989
CG9993
Cha
Chd64
CheA75a
CheA84a
CheB42b
CheB74a
CheB93b
cher
CHES-1-like
chic
chinmo
CHIP
chn
Cht3
Cib2
cic
cindr
Cip4
CkIIalpha
CkIIalpha-i1
Clk
CLS
clumsy
cnc
CngA
Cngl
cni
cnk
CNMaR
cno
Cnx14D
Cnx99A
coil
comm
comm2
Con
Coop
Corin
coro
Corp
corto
Cp1
cpb
Cpn
cpo
Cpr100A
Cpr49Ab
Cpr49Ac
Cpr50Ca
Cpr65Ay
Cpr65Az
Cpr65Ea
Cpr65Eb
Cpr66D
Cpr76Ba
Cpr97Ea
Cpsf160
Crc
CrebA
CrebB
crim
crol
crp
cry
CrzR
Csp
ct
CTPsyn
Ctr1C
ctrip
cue
Cul2
cv
cv-c
cwo
cyc
CycA
CycB
CycB3
CycE
CycG
Cyp12e1
Cyp28a5
Cyp309a2
Cyp310a1
Cyp312a1
Cyp49a1
Cyp4c3
Cyp4d20
Cyp4p2
Cyp6a14
Cyp6a18
Cyp6t1
Cyp6v1
Cyp9b1
Cyt-c-d
D
d-cup
d4
Dab
Dad
dah
dan
danr
dap
Dbp80
Dbx
Ddr
Debcl
Der-1
Df31
Dfd
Dgk
Dh31-R
Dh44-R1
Dhc36C
Dhc64C
Dhc98D
Diap1
dib
Dic1
Dic3
Dic61B
Diedel2
Diedel3
DIP2
disco
disco-r
Dl
Dlc90F
dlg1
Dll
dlp
dm
dmpd
dmrt99B
DNApol-eta
DNaseII
dnc
dnk
Doa
Doc1
Dop1R1
Dop1R2
Dop2R
dpn
dpr10
dpr12
dpr16
dpr17
dpr4
dpr5
dpr8
dpr9
Dr
Drep-3
Drip
Drl-2
drm
ds
Dscam1
Dscam2
Dscam3
Dscam4
dsx
dsx-c73A
dve
dyn-p25
Dyrk2
Dys
E(spl)m2-BFM
E(spl)m5-HLH
E(spl)m7-HLH
E(spl)m8-HLH
E(spl)malpha-BFM
E(spl)mbeta-HLH
E(spl)mdelta-HLH
E(spl)mgamma-HLH
e(y)2b
E23
E2f1
Eaat1
Eaat2
eag
eap
ebd2
EcR
ed
edl
EF-G2
Ef1alpha48D
EF2
Efa6
eg
Egfr
egg
egl
egr
Eh
eIF-4a
eIF4E-4
eIF4E-7
eIF5B
eIF6
Eip63E
Eip63F-1
Eip74EF
Eip75B
Ela
elav
elB
Elba2
emc
en
ena
EndoB
Eno
Ent2
Epac
eRF1
ergic53
erm
esg
esn
Esyt2
ETHR
Ets65A
Ets98B
ewg
ex
exex
exu
ey
eya
Fad2
fas
Fas2
Fatp
Fbp1
fd59A
fd96Cb
fdy
FeCH
Fem-1
fend
Fer1
Fer1HCH
Fer2
Fhos
Fib
Fife
Fim
Fis1
Fkbp14
fkh
Flo1
fne
fng
fog
for
foxo
frac
fray
fred
FRG1
Frq1
fru
fs(1)h
fs(1)M3
fs(2)ltoPP43
ft
fu12
Fur1
fuss
futsch
fw
fz2
fz3
fzy
Gad1
galectin
GalNAc-T1
Gasp
GATAd
Gbs-70E
Gbs-76A
Gclc
gdl
gek
gem
Gem2
Gfrl
GILT1
gl
Gld2
glec
glob2
Glt
GluRIB
GluRIIA
Glut1
Glut4EF
Glycogenin
Gnf1
gogo
gol
Gp150
Gp210
Gr21a
Gr22d
Gr22f
Gr39b
Gr68a
Gr77a
Gr92a
Gr93a
Gr98a
Gr98d
grh
grim
Grip
Grip128
Grip163
grn
grp
grsm
Grx-1
gry
gsb
gsb-n
GstD3
Gug
gukh
gus
gw
Gyc76C
Gyc88E
Gycbeta100B
h
H15
haf
ham
hang
hb
hbn
HDAC4
hdc
hdly
heph
Hers
Hey
HGTX
hid
hipk
hiw
hkb
HLH4C
HmgD
Hmgs
Hmu
Hmx
hng2
hng3
hoip
HP1e
HP4
HP6
hppy
Hr4
Hs6st
Hsc70Cb
Hsp27
Hsp60C
Hsp70Bc
hth
Hug
hyd
I-3
IA-2
Idgf1
Idgf4
Idh
ifc
igl
Ilp2
Ilp6
Ilp7
Ilp8
Imp
ImpL2
inaC
inc
ind
InR
insb
insc
insv
Int6
IntS12
IntS3
IntS4
Inx2
Inx3
Inx6
IP3K1
Ipod
Ir25a
Ir41a
Ir47a
Ir56a
Ir56d
Ir64a
Ir67a
Ir75d
Ir7a
Ir92a
Ire1
Itp-r83A
Jafrac1
jar
jdp
jeb
Jheh2
jigr1
jim
jing
Jon65Ai
jumu
jv
Jwa
Kah
kay
KCNQ
Kdm4B
kdn
Keap1
kek3
kek5
kek6
ken
kibra
kirre
kl-2
klar
klg
Klp3A
Klp54D
Klp59C
klu
kn
kni
knrl
ko
koko
kon
KP78a
KP78b
Kr
Kr-h1
KrT95D
ksh
ktub
L
l(1)G0007
l(1)G0193
l(1)G0222
l(1)G0320
l(1)sc
l(2)09851
l(2)35Bd
l(2)37Cg
l(2)k01209
l(3)05822
l(3)72Dp
l(3)L1231
l(3)mbt
l(3)neo38
lab
Lac
lace
laf
lama
lambdaTry
LamC
Las
Lasp
lbk
Lcp1
Lcp65Af
lea
Letm1
Lgr1
Lgr3
lgs
lid
lig
lilli
Lim1
Lim3
lin-28
Lin29
Lip4
Lis-1
Lk6
Lmpt
lola
lov
lox
lox2
LpR2
LRP1
Lrr47
LS2
LysP
Mad
mad2
mael
Maf1
MAGE
Magi
mas
mbc
mbl
Mcm10
Mdh2
Mdr49
me31B
MED10
MED11
Mef2
mei-P26
Meics
melt
Meltrin
Membrin
Men
Menl-1
Menl-2
Mes2
MESR4
metl
mew
Mf
MFS15
mGluR
mid
mil
milt
mino
Mio
miple
miple2
mira
Miro
mirr
Mlc-c
Mlc2
mld
Mmp2
Mnt
Mob2
mod
Moe
mos
Mp
mrj
mRpL52
mRpS22
mRpS6
Mrtf
ms(3)76Ba
msi
msn
Msp300
mspo
MsR2
Mst85C
Mst87F
MTA1-like
mtd
mthl10
mthl8
MtnC
mtt
mub
Muc68Ca
Muc68E
Muc96D
Mur82C
Mur89F
mura
Myo31DF
Myo61F
MYPT-75D
mys
N
Naam
nab
nAChRalpha1
nAChRalpha2
nAChRbeta2
NaCP60E
NaPi-T
natalisin
Ncc69
Nep1
Nep3
nerfin-1
net
NetA
NetB
Neto
neur
Nhe2
NijA
NimC2
NimC4
nkd
Nlg1
Nlg2
Nlg4
Nmdar2
Nmdmc
nmo
noc
Nox
Npc1b
Npc2b
Npc2d
NPFR
Nplp1
Nrt
nrv1
Nrx-IV
nSyb
Ntf-2
nub
Nuf2
numb
Nup154
Nup214
Nup37
Nup98-96
nyo
Oamb
Oatp30B
Obp28a
Obp47a
Obp51a
Obp56g
Obp57a
Obp85a
Obp99c
Oct-TyrR
Octbeta1R
Octbeta2R
Oda
odd
ogre
olf186-M
olf413
Oli
ome
opa
Optix
Or24a
Or30a
Or43a
Or45a
Or59b
Or63a
Or65c
Or67d
Or83c
Or85e
Or92a
Or98b
Orco
Orct2
Oscillin
Oseg2
Osi12
Osi17
Osi19
Osi3
osk
osp
otk
otk2
ovo
p130CAS
pain
pan
[truncated: 495 more rows]
